# Supplementary material for: Comparing Survival of Israeli Acute Paralysis Virus Infection among Stocks of U.S. Honey Bees
Source: PubMed Central journal article supplement (PMC7827508; doi:10.3390/insects12010060), 2021-01-12
Supplement: insects-12-00060-s001.pdf [file insects-12-00060-s001.pdf]

Supplementary Table S1: The forward and reverse primer sequences of immune genes used for RT-qPCR. The primers used in the study were synthesized by MWG Eurofins.

| Gene name          | Reverse Primer Sequence     | Forward Primer Sequence       | References                             |
|--------------------|-----------------------------|-------------------------------|----------------------------------------|
| Actin              | GAAGCAAGAATTGACCC<br>ACCAA  | CCTAGCACCATCCACCAT<br>GAA     | <b>Galbraith et al. 2015</b>           |
| RPS5               | TAACGTCCAGCAGAATGT<br>GGTA  | AATTATTTGGTCGCTGGA<br>ATTG    | <b>Brito, McHale, and Oldroyd 2010</b> |
| Toll-6             | GACAGGTCTGAACGTCTCC<br>AG   | TCCGAGGCGTCAACAGGA<br>ATCGACC | <b>Galbraith et al. 2015</b>           |
| Dicer-Like         | TCTCCACTAAGTGCTGCA<br>CAA   | CCAACAGGAGCTGGAAA<br>AAC      | <b>Galbraith et al. 2015</b>           |
| Argonaute-2        | TTGCGGTGAACTTTGTTG<br>TT    | TCAACAGCAGCAATCGG<br>ATA      | <b>Galbraith et al. 2015</b>           |
| Apidaecin          | TTTCACGTGCTTCATATTC<br>TTCA | TAGTCGCGGTATTTGGGA<br>AT      | <b>Evans et al. 2006</b>               |
| Hymenoptae<br>n    | GCGTCTCCTGTCATTCCA<br>TT    | CTCTTCTGTGCCGTTGCAT<br>A      | <b>Evans et.al 2006</b>                |
| hopscotch<br>(hop) | AACCTCCAAATCGCTCTG<br>TG    | TTGTGCTCCTGAAAATGCT<br>G      | <b>Chen et al.2014</b>                 |

Supplementary Table S2: List of virus-specific primers used.

| Target         | Reverse Primer sequence      | Forward Primer sequence      | References                     |
|----------------|------------------------------|------------------------------|--------------------------------|
| DWV-<br>TYPE A | CTCATTAACTGTGTCGTT<br>GAT    | TACTAGTGCTGGTTTTCC<br>TTT    | <b>Kevill et al., 2017</b>     |
| DWV-<br>TYPE B | CTCATTAACTGAGTTGTT<br>GTC    | TACTAGTGCTGGTTTTCC<br>TTT    | <b>Kevill et al., 2017</b>     |
| DWV-<br>TYPE C | ATAAGTTGCGTGGTTGAC           | TACTAGTGCTGGTTTTCC<br>TTT    | <b>Kevill et al., 2017</b>     |
| IAPV           | CTGAATAATACTGTGCGT<br>ATC    | CCATGCCTGGCGATTAC            | <b>De Miranda et al., 2010</b> |
| ABVP           | GCTCCTATTGCTCGGTTTT<br>TCGGT | TTATGTGTCCAGAGACT<br>GTATCCA | <b>Chen et al., 2006</b>       |
| BQCV           | GCAACAAGAAGAAACGT<br>AAACCAC | TGGTCAGCTCCCACTAC<br>CTTAAAC | <b>Chen et al., 2006</b>       |
| CBPV           | ACTACTAGAAACTCGTCG<br>CTTCG  | CGCAAGTACGCCTTGAT<br>AAAGAAC | <b>Blanchard et al., 2007</b>  |
| KBV            | TGTGGGTTGGCTATGAGT<br>CA     | GATGAACGTCGACCTAT<br>TGA     | <b>Stoltz et al., 1995</b>     |
| SBV            | ACACTGCGCGTCTAACAT<br>TCC    | AACGTCCACTACACCGA<br>AATGTC  | <b>Blanchard et al., 2014</b>  |
